# Supplementary material for: Composition of Coloured Gastric Residuals in Extremely Preterm Infants-A Nested Prospective Observational Study
Source: PubMed Central journal article supplement (PMC7551671; doi:10.3390/nu12092585), 2020-08-26
Supplement: nutrients-12-02585-s001.pdf [file nutrients-12-02585-s001.pdf]

**Table S1.** (a): Raw values of aspirate characteristics for the total sample and among samples stratified by colour grade; (b): Raw values of aspirate characteristics among samples stratified by SiMPro treatment groups.

(a)

| Characteristics of Aspirate | Total Sample<br><i>n</i> = 74                 | Pale Green<br><i>n</i> = 15                 | Avocado <i>n</i> = 30                         | Spinach <i>n</i> = 29                         |
|-----------------------------|-----------------------------------------------|---------------------------------------------|-----------------------------------------------|-----------------------------------------------|
| Volume (g)                  | 1.26 (0.89–2.13)                              | 1.44 (1.00–2.43)                            | 1.63 (1.01–2.81)                              | 1.12 (0.63–1.30)                              |
| pH                          | 4.31 (2.88–5.23)                              | 4.23 (2.72–4.90)                            | 3.74 (2.81–4.74)                              | 4.87 (3.05–6.05)                              |
| Osmolality (mOsM)           | 332 (311–373)                                 | 324 (305–368)                               | 333 (315–413)                                 | 347 (306–373)                                 |
| Nitrogen (g/L)              | 7.72 (5.75–10.25)                             | 7.05 (5.18–9.42)                            | 8.42 (5.72–11.51)                             | 7.63 (6.10–11.84)                             |
| CHO (g/L)                   | 38.36 (22.48–73.87)                           | 35.03 (23.93–56.93)                         | 40.38 (24.13–80.43)                           | 30.05 (10.70–80.21)                           |
| Bile acid (µmole/L)         | 1322.22 (369.45–<br>2492.65)<br><i>n</i> = 52 | 270.84 (101.04–<br>1258.34)<br><i>n</i> = 8 | 1388.89 (544.45–<br>2014.71)<br><i>n</i> = 17 | 1388.89 (533.33–<br>2617.65)<br><i>n</i> = 27 |
| Fat content (g/L)           | 17.49 (6.81–25.87)<br><i>n</i> = 71           | 19.96 (6.87–25.87)<br><i>n</i> = 15         | 20.68 (10.90–32.92)<br><i>n</i> = 28          | 10.38 (5.13–18.27)<br><i>n</i> = 28           |
| <b>Treatment group</b>      |                                               |                                             |                                               |                                               |
| Single-strain               | 32 (43.2%)                                    | 7 (46.7%)                                   | 15 (50.0%)                                    | 10 (34.5%)                                    |
| Three-strain                | 42 (56.8%)                                    | 8 (53.3%)                                   | 15 (50.0%)                                    | 19 (65.5%)                                    |

Data represent median and interquartile range.

(b)

| Characteristics of Aspirate | Single-strain Samples<br><i>n</i> = 32 | Three-strain Samples<br><i>n</i> = 42 |
|-----------------------------|----------------------------------------|---------------------------------------|
| Volume (g)                  | 1.29 (0.90–2.09)                       | 1.25 (0.86–2.21)                      |
| pH                          | 3.77 (2.79–4.91)                       | 4.55 (3.23–5.65)                      |
| Osmolality m(OsM)           | 348 (314–374)                          | 325 (309–372)                         |
| Nitrogen (g/L)              | 7.62 (5.37–9.91)                       | 7.80 (6.04–10.84)                     |
| CHO (g/L)                   | 43.21 (19.24–79.52)                    | 36.02 (22.48–63.17)                   |
| Bile acid (µmole/L)         | 1322 (742–2574)<br><i>n</i> = 22       | 1250 (133–2360)<br><i>n</i> = 30      |
| Fat content (g/L)           | 19.83 (9.68–26.07)<br><i>n</i> = 31    | 14.68 (5.13–21.52)<br><i>n</i> = 40   |

Data represent median and interquartile range.

**Table S2.** Nutrition and feeding.

|                                                    | Control<br><i>n</i> = 16 | Single-strain<br><i>n</i> = 70 | Three-strain<br><i>n</i> = 75 | <i>p</i> -value |
|----------------------------------------------------|--------------------------|--------------------------------|-------------------------------|-----------------|
| TPN duration <sup>®</sup>                          | 16 (13–20)               | 10 (7–13)                      | 10 (8–16)                     | 0.001           |
| Age (d) reached minimal enteral feeds <sup>®</sup> | 4 (3–7)                  | 2 (2–3)                        | 2 (2–3)                       | < 0.001         |
| EBM <sup>‡</sup>                                   | 15 (93.8%)               | 58 (82.9%)                     | 57 (76.0%)                    | 0.239           |
| PDHM <sup>‡</sup>                                  | 1 (6.3%)                 | 21 (30.0%)                     | 31 (41.3%)                    | 0.020           |
| Age (d) reached 150 mL/kg/day/ TFEF <sup>®</sup>   | 18 (15–24)               | 13 (10–18)                     | 12 (10–20)                    | 0.008           |
| EBM <sup>‡</sup>                                   | 15 (93.8%)               | 61 (87.1%)                     | 68 (90.7%)                    | 0.698           |
| PDHM <sup>‡</sup>                                  | 1 (6.3%)                 | 28 (40.0%)                     | 25 (33.3%)                    | 0.263           |
| Time to full feeds (day) <sup>®</sup>              | 14 (11–18)               | 10 (8–16)                      | 10 (7–16)                     | 0.152           |

Data represent: @: median, interquartile range, #: *n* (%), as appropriate. Abbreviations: PN-parenteral nutrition, EBM-expressed breast milk, PDHM-pasteurised donor human milk.
